# Supplementary material for: A V2O3-ordered mesoporous carbon composite with novel peroxidase-like activity towards the glucose colorimetric assay
Source: Royal Society of Chemistry journal article supplement (doi:10.1039/c5nr02694f), 2015-01-01
Supplement: c5nr02694f1.pdf [file c5nr02694f1.pdf]

## Electronic Supplementary Information

### **V<sub>2</sub>O<sub>3</sub>-Ordered Mesoporous Carbon Composite with Novel Peroxidase-Like Activity towards Glucose Colorimetric Assay†**

Lei Han,<sup>‡ab</sup> Lingxing Zeng,<sup>‡c</sup> Mingdeng Wei,<sup>\*d</sup> Chang Ming Li,<sup>e</sup> and Aihua Liu<sup>\*ab</sup>

*<sup>a</sup>Laboratory for Biosensing, Key Laboratory of Biofuels, and Shandong Provincial Key Laboratory of Energy Genetics, Qingdao Institute of Bioenergy & Bioprocess Technology, Chinese Academy of Sciences, 189 Songling Road, Qingdao 266101, China*

*<sup>b</sup>University of Chinese Academy of Sciences, 19A Yuquan Road, Beijing 100049, China*

*<sup>c</sup>Engineering Research Center of Polymer Green Recycling of Ministry of Education, Fujian Normal University, Fuzhou, Fujian 350007, China*

*<sup>d</sup>Institute of Advanced Energy Materials, Fuzhou University, Fuzhou, Fujian 350002, China*

*<sup>e</sup>Institute for Clean Energy & Advanced Materials, Southwest University, Chongqing 400715, China*

<sup>‡</sup> Authors of equal contribution

<sup>†</sup> Electronic supplementary information (ESI) available

<sup>\*</sup>Corresponding Authors.

E-mail addresses: liuah@qibebt.ac.cn (A. Liu); wei-mingdeng@fzu.edu.cn (M. Wei).

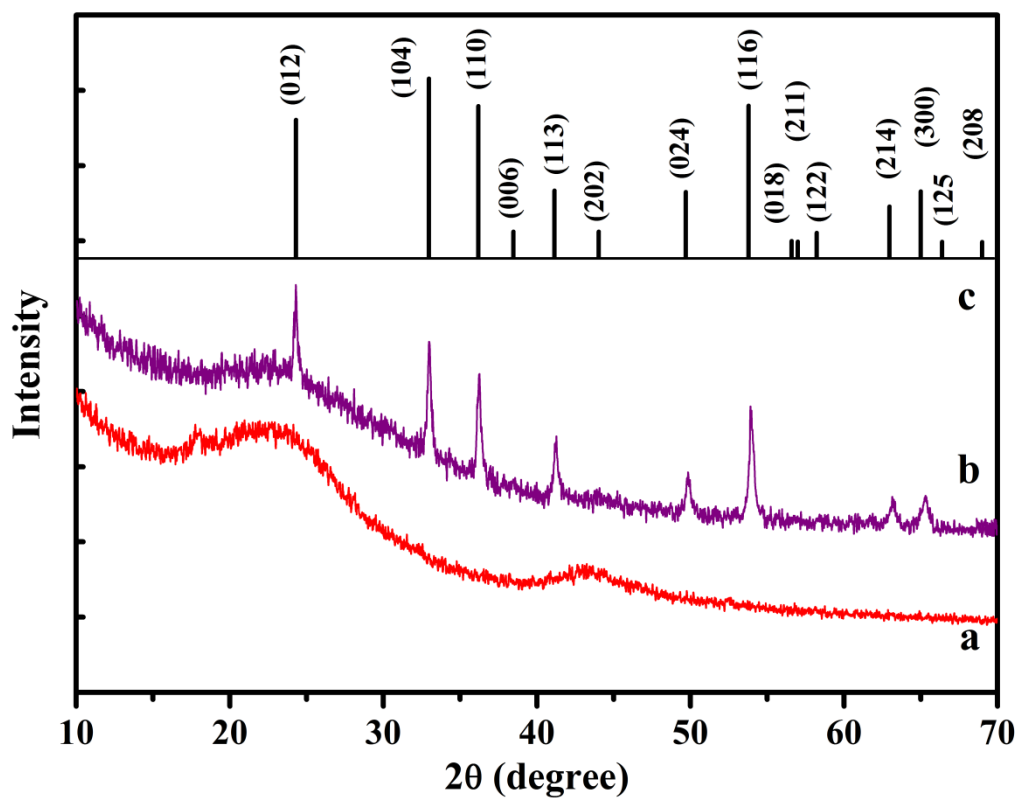

**Fig. S1.** The XRD patterns of (a) OMC, (b) V<sub>2</sub>O<sub>3</sub>-OMC and (c) the standard values of V<sub>2</sub>O<sub>3</sub> (JCPDS 074-0325).

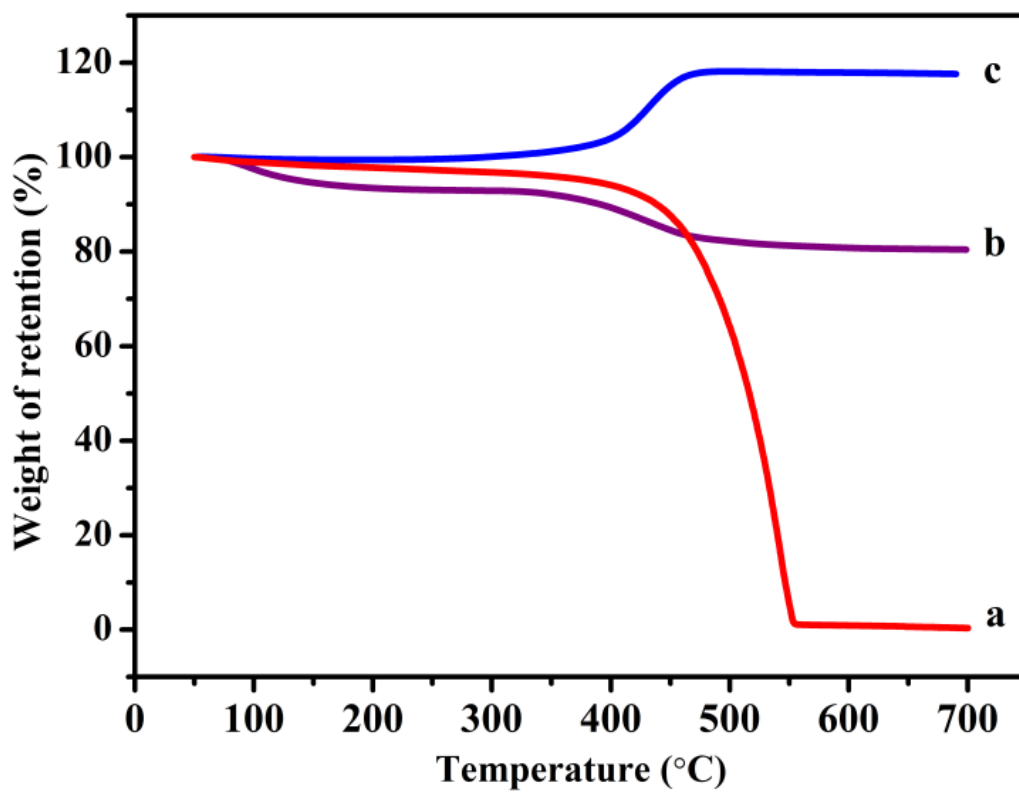

**Fig. S2.** TGA curves of OMC (a), V<sub>2</sub>O<sub>3</sub>-OMC (b) and V<sub>2</sub>O<sub>3</sub> (c).

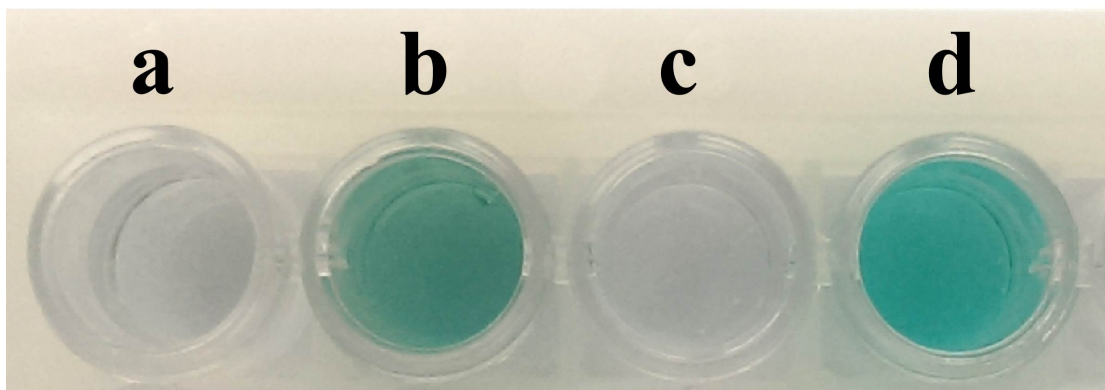

**Fig. S3.** Photographs of reaction solutions in microplates. The oxidation of various typical chromogenic substrates of ABTS (a,b) and TMB (c,d) without  $V_2O_3$ -OMC (a,c) or with  $V_2O_3$ -OMC (b, d) in the present of  $H_2O_2$ .

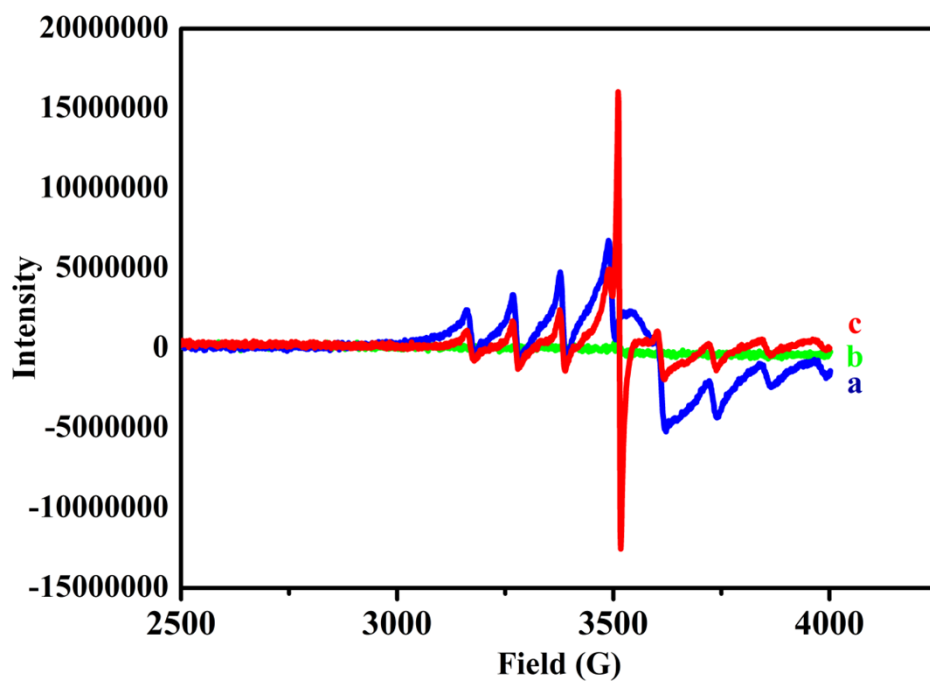

**Fig. S4.** EPR spectra of (a)  $\text{H}_2\text{O}_2$ ; (b)  $\text{V}_2\text{O}_3 + \text{H}_2\text{O}$ ; (c)  $\text{V}_2\text{O}_3 + \text{H}_2\text{O}_2$ .

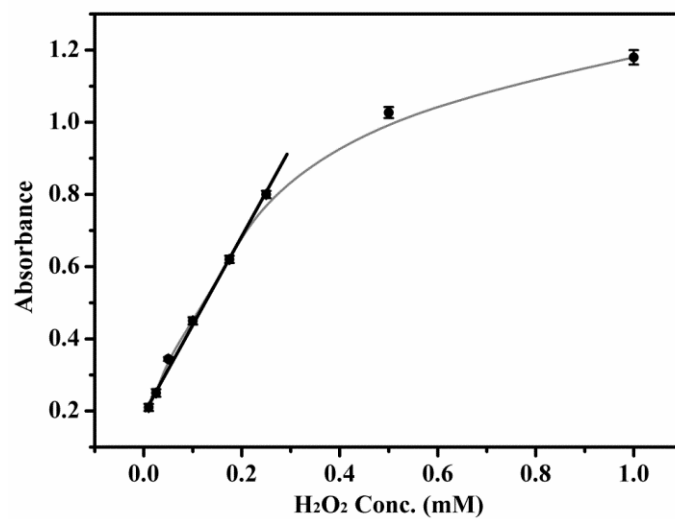

**Fig. S5.** The calibration curve for H<sub>2</sub>O<sub>2</sub>.

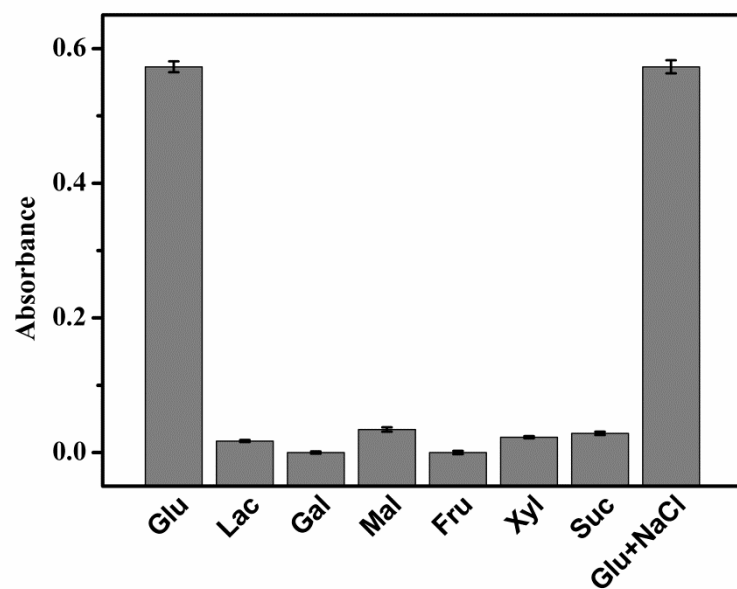

**Fig. S6.** Specificity analysis of spectrophotometric detection of glucose for each 2 mM of glucose (Glu), lactose (Lac), galactose (Gal), maltose (Mal), fructose (Fru), xylose (Xyl), and sucrose (Suc), and 2 mM of Glu in 0.15 M NaCl.
